# Supplementary material for: VISTA Ligation Reduces Antitumor T-Cell Activity in Pancreatic Cancer
Source: MDPI journal article supplement (doi:10.3390/cancers15082326), 2023-04-17
Supplement: s1 [file s1]

**Figure S1. Impact of VISTA expression on clinicopathologic feature.** **A** VISTA expression on PanCK<sup>+</sup> was not associated with tumor size, lymph node metastasis, or UICC stage (n = 67; Kruskal-Wallis test with Dunn's statistics). **B** Neoadjuvant therapy did not influence VISTA expression (n = 67; Mann-Whitney test). **C** Survival analysis of PDAC patients according to their VISTA<sup>+</sup> PanCK<sup>+</sup> expression (median) shown as Kaplan Meier curves (n = 67; overall survival:  $P = 0.24$ ; Log-rank test).

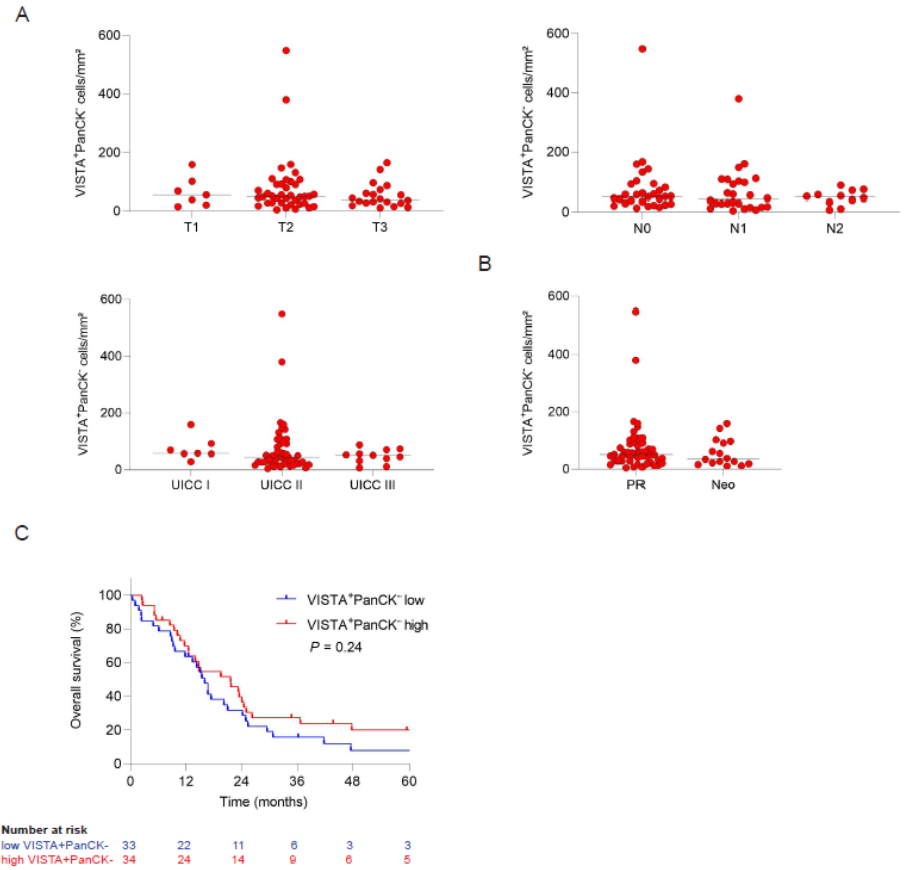

**Figure S2. VSIR expression plays an important role in human pancreatic ductal adenocarcinoma.** **A** PDAC patients (n = 179) showed a higher VSIR expression compared to normal pancreatic tissue (n = 171;  $P < 0.001$ ; one-way ANOVA). **B** VSIR expression was not associated with tumor size, lymph node metastasis, or UICC stage (n = 145; Kruskal-Wallis test with Dunn's statistics or Mann-Whitney test). **C** Kaplan Meier plots of the correlation between VSIR mRNA expression (1<sup>st</sup> and 3<sup>rd</sup> tercile) and patient survival (n = 91; overall survival:  $P = 0.128$ ; Log-rank test). **D** Association between high and low terciles of VSIR mRNA expression and leukocyte marker *PTPRC* (CD45;  $P < 0.001$ ), T cell markers *CD3E* ( $P = 0.086$ ), *CD4* ( $P = 0.102$ ), *CD8A* ( $P = 0.099$ ), *FOXP3* ( $P = 0.199$ ), *GATA3* ( $P = 0.184$ ), *TBX21* ( $P < 0.001$ ), marker of APCs *HLA-DRA* ( $P < 0.001$ ) and macrophages/monocytes *ITGAM/CD14* ( $P = 0.073$ ;  $P = 0.577$ ; Mann-Whitney test; n = 96). **E** Boxplot of mRNA expression of immune checkpoints *IDO2*, *ADORA2A*, *TIGIT*, *LAG3*, *PDCD1* (PD-1), *CTLA4*, *PDCD1LG2* (PD-L2), *CD274* (PD-L1), *IDO1*, *HAVCR2* (TIM-3) and VSIR (VISTA) in PDAC (n = 144).

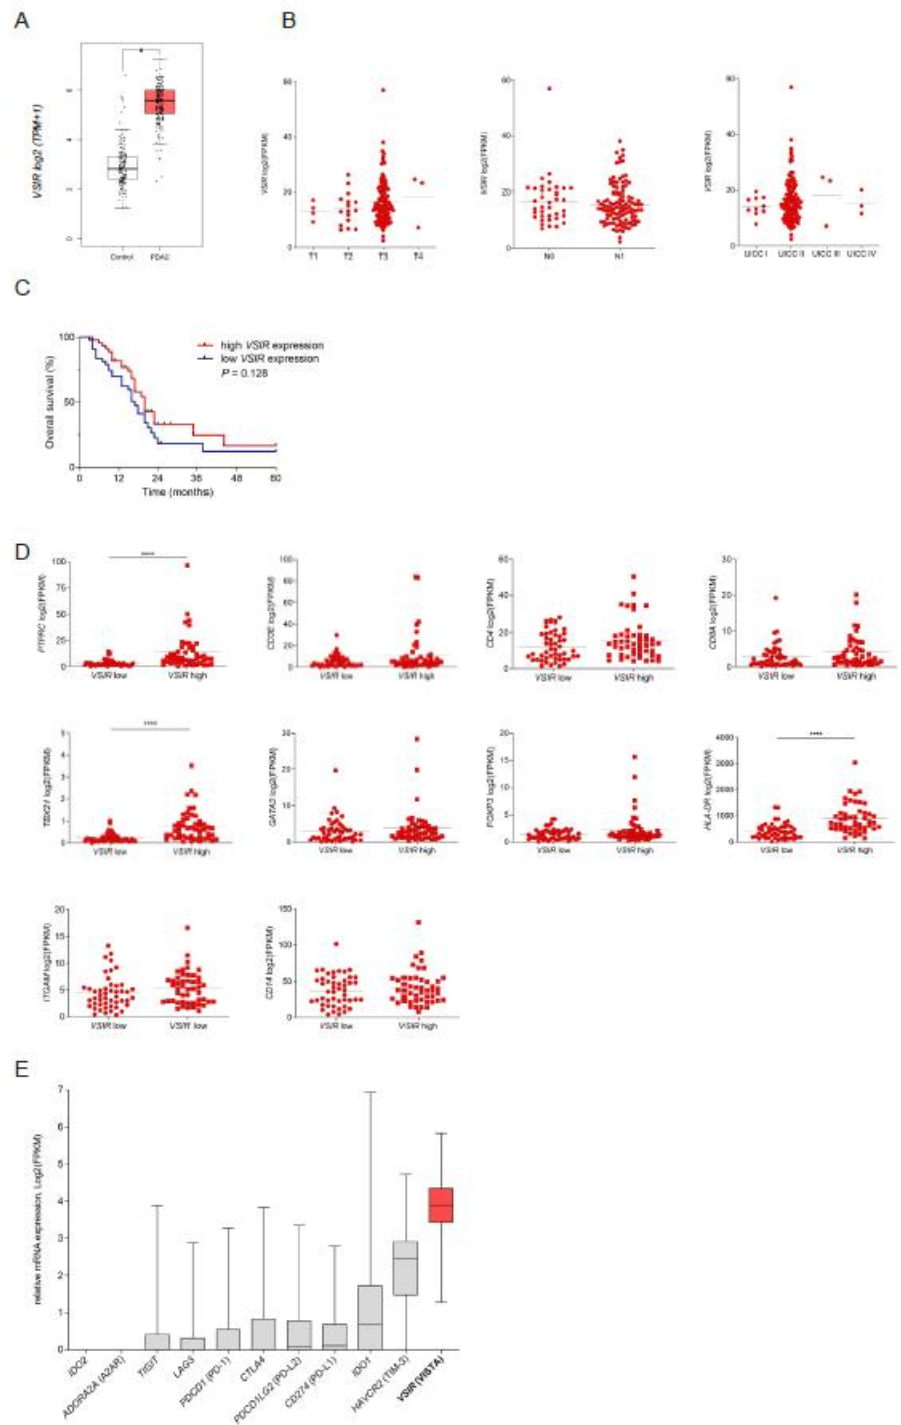

**Supplementary Table S1.**  
List of antibodies used for flow cytometry

| Name                    | Reference                |
|-------------------------|--------------------------|
| CD11b anti-human AF-700 | Biolegend, # 101222      |
| CD14 anti-human V500    | BD Biosciences, # 561391 |
| CD19 anti-human PE-Cy7  | BD Biosciences, # 557835 |
| CD3 anti-human APC-H7   | BD Biosciences, # 560176 |
| CD3 anti-human PE-Cy7   | BD Biosciences, # 557851 |
| CD4 anti-human PB       | BD Biosciences, # 558116 |

|                                      |                          |
|--------------------------------------|--------------------------|
| CD45 anti-human APC                  | BD Biosciences, # 555485 |
| CD45 anti-human BV605                | BD Biosciences, # 564047 |
| CD56 anti-human PE-Cy7               | BD Biosciences, # 557747 |
| CD8 anti-human V500                  | BD Biosciences, # 561618 |
| Hamster IgG                          | Biolegend, # 400922      |
| IFN $\gamma$ anti-human BV711        | BD Biosciences, # 564793 |
| Mouse IgG1, $\kappa$ BV711           | BD Biosciences, # 563044 |
| Mouse IgG1, $\kappa$ FITC            | Biolegend, # 400110      |
| Mouse IgG2B PE                       | R&D Systems, # 133303    |
| TCR $\gamma\delta$ anti-human PE-Cy7 | Biolegend, # 331221      |
| TNF $\alpha$ anti-human FITC         | BD Biosciences, # 554512 |
| VISTA anti-human PE                  | R&D Systems, # 730804    |

### Supplementary Table S2.

Clinicopathologic characteristics of mIF PDAC cohort

|                              | VISTA low |          | VISTA high |         | P-value            |
|------------------------------|-----------|----------|------------|---------|--------------------|
|                              | years     |          | years      |         |                    |
| <b>Mean age</b>              | 67        |          | 66         |         | 0.82 <sup>a</sup>  |
| <b>Age range</b>             | 47 - 77   |          | 36 - 79    |         |                    |
|                              | n (%)     |          | n (%)      |         | P-value            |
| <b>Gender</b>                |           |          |            |         |                    |
| Female                       | 21        | (61.76)  | 15         | (42.86) | 0.116 <sup>b</sup> |
| Male                         | 13        | (38.24)  | 20         | (57.14) |                    |
| <b>pT Stage</b>              |           |          |            |         |                    |
| 1                            | 6         | (17.65)  | 1          | (2.86)  | 0.062 <sup>b</sup> |
| 2                            | 15        | (44.12)  | 24         | (68.57) |                    |
| 3                            | 11        | (32.35)  | 10         | (28.57) |                    |
| 4                            | 0         | (0.00)   | 0          | (0.00)  |                    |
| Unknown                      | 2         | (5.88)   | 0          | (0.00)  |                    |
| <b>pN Stage</b>              |           |          |            |         |                    |
| 0                            | 16        | (47.06)  | 16         | (45.71) | 0.492 <sup>b</sup> |
| 1                            | 11        | (32.35)  | 15         | (42.86) |                    |
| 2                            | 7         | (20.59)  | 4          | (11.43) |                    |
| <b>pM Stage</b>              |           |          |            |         |                    |
| 0                            | 34        | (100.00) | 34         | (97.14) | 0.321 <sup>b</sup> |
| 1                            | 0         | (0.00)   | 1          | (2.86)  |                    |
| <b>UICC Stage</b>            |           |          |            |         |                    |
| I                            | 3         | (8.82)   | 4          | (11.43) | 0.567 <sup>b</sup> |
| II                           | 24        | (70.59)  | 26         | (74.28) |                    |
| III                          | 7         | (20.59)  | 4          | (11.43) |                    |
| IV                           | 0         | (0.00)   | 1          | (2.86)  |                    |
| <b>Neoadjuvant Treatment</b> |           |          |            |         |                    |

|     |    |         |    |         |                    |
|-----|----|---------|----|---------|--------------------|
| Yes | 9  | (26.47) | 8  | (22.86) | 0.728 <sup>b</sup> |
| No  | 25 | (73.53) | 27 | (77.14) |                    |

---

<sup>a</sup> t-test

<sup>b</sup> Chi-squared test
